# Supplementary material for: Association of fibrinogen/albumin ratio and Castelli risk index 2 (CI2 = LDL-C/HDL-C) with severity of coronary artery disease and carotid atherosclerosis in different glucose metabolism states
Source: Research Square preprint supplement (doi:10.21203/rs.3.rs-5827255/v1), 2025-01-20
Supplement: Supplementary file 1 [file 5169607937363c17c21b2f17.docx]

**Highlights**

1. **Innovative Combination of Biomarkers**: The study combines the fibrinogen/albumin ratio with Castelli risk index 2 (CI2) to explore their association with coronary artery disease and carotid atherosclerosis.

2.**Analysis of Glucose Metabolism States**: The research delves into the impact of different glucose metabolism states (such as diabetes and impaired glucose tolerance) on the severity of cardiovascular diseases.

3.**Clinical Application Potential**: The study provides a new combination of biomarkers for clinical use, offering good potential for prognosis and risk assessment.

4.**Filling the Academic Gap**: This work fills a research gap regarding the relationship between glucose metabolism abnormalities and cardiovascular diseases, providing new theoretical and data support.
